# Supplementary material
Source: Springer Nature journal article supplement (https://www.springermedizin.de/resource/supplementary/12865_2008_255_MOESM1_ESM.pdf/9427610)

(a) Adult DCs

(b) CB DCs

TLR-1

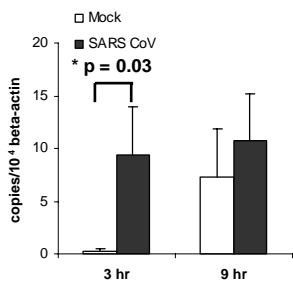

TLR-1

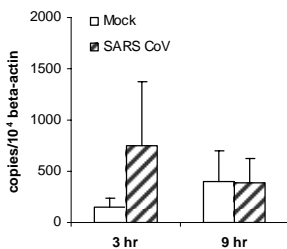

TLR-2

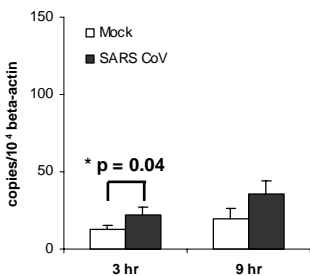

TLR-2

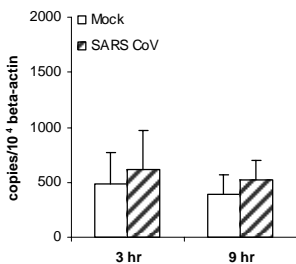

TLR-4

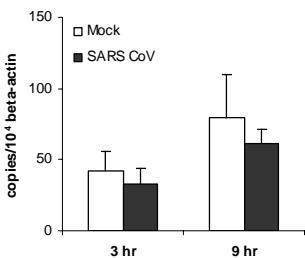

TLR-4

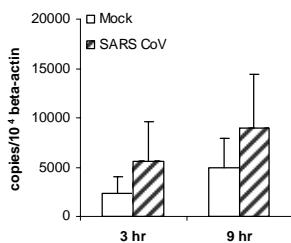

TLR-5

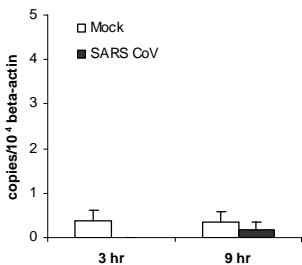

TLR-5

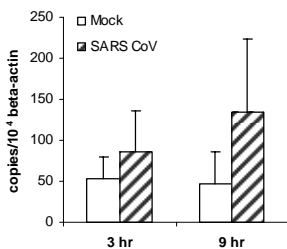

TLR-6

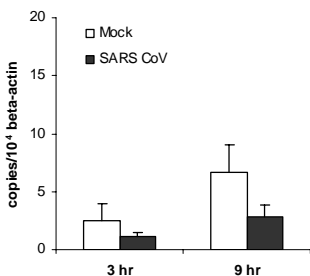

TLR-6

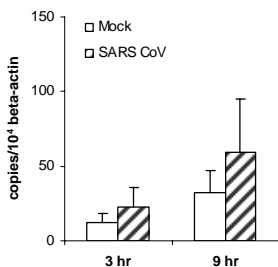

Supplement: MOESM1 [file 9427610]
